# Supplementary material
Source: PubMed Central journal article supplement (PMC10188199)
Supplement: NIHMS1866083-supplement-1.pdf [file NIHMS1866083-supplement-1.pdf]

## **AMERICAN JOURNAL OF PREVENTIVE MEDICINE**

**ARTICLE TITLE:** Screening for Prediabetes and Diabetes: Clinical Performance and Implications for Health Equity

**AUTHORS:** Matthew J. O'Brien, MD, MSc; Yan Zhang, MPH, MS; Stacy C. Bailey, PhD, MPH; Sadiya S. Khan, MD, MSc; Ronald T. Ackermann, MD, MPH; Mohammed K. Ali, MD, MSc; Stephen R. Benoit, MD, MPH; Giuseppina Imperatore, MD, PhD; Christopher S. Holliday, PhD; Kai McKeever Bullard, PhD, MPH

### **APPENDIX MATERIAL FOR ONLINE PUBLICATION**

**Appendix Table 1:** Characteristics of U.S. Adults with Prediabetes and Undiagnosed Diabetes According to Alternate Diagnostic Criteria

**Appendix Table 2:** Performance of Screening Criteria based on Fasting Plasma Glucose Alone by Self-Reported Race and Ethnicity

**Appendix Table 3:** Performance of Screening Criteria based on Hemoglobin A<sub>1c</sub> Alone by Self-Reported Race and Ethnicity

**Appendix Table 4:** Characteristics of U.S. Adults Aged 35-70 Years without Diagnosed Diabetes

**Appendix Table 1: Characteristics of U.S. Adults with Prediabetes and Undiagnosed Diabetes According to Alternate Diagnostic Criteria**

| Characteristic <sup>a</sup>            | Fasting Plasma Glucose or Hemoglobin A <sub>1c</sub> <sup>b</sup> |                  | Fasting Plasma Glucose <sup>c</sup> |                  | Hemoglobin A <sub>1c</sub> <sup>d</sup> |                  |
|----------------------------------------|-------------------------------------------------------------------|------------------|-------------------------------------|------------------|-----------------------------------------|------------------|
|                                        | Population size <sup>e</sup>                                      | % (95% CI)       | Population size <sup>e</sup>        | % (95% CI)       | Population size <sup>e</sup>            | % (95% CI)       |
| Unweighted n                           | 1,654                                                             |                  | 1,213                               |                  | 1,134                                   |                  |
| Weighted n <sup>e</sup>                | 100.7                                                             | 46.8 (43.9-49.7) | 77.9                                | 36.1 (33.2-39.1) | 58.2                                    | 27.0 (24.6-29.6) |
| Female sex                             | 47.6                                                              | 47.3 (43.9-50.7) | 33.7                                | 43.3 (39.2-47.5) | 32.2                                    | 55.3 (50.6-60.0) |
| Age, years                             | 100.7                                                             | 52.5 (50.9-54.1) | 77.9                                | 52.1 (50.1-54.1) | 58.2                                    | 55.8 (54.2-57.4) |
| Age categories                         |                                                                   |                  |                                     |                  |                                         |                  |
| 18-29                                  | 11.5                                                              | 11.4 (9.4-13.9)  | 9.1                                 | 11.7 (8.4-16.2)  | 4.1                                     | 7.1 (4.7-10.4)   |
| 30-34                                  | 6.4                                                               | 6.4 (4.1-9.7)    | 5.4                                 | 6.9 (4.2-11.3)   | 2.2                                     | 3.7 (2.5-5.5)    |
| 35-39                                  | 6.9                                                               | 6.8 (5.4-8.6)    | 5.9                                 | 7.5 (5.9-9.6)    | 3.6                                     | 6.2 (4.5-8.5)    |
| 40-70                                  | 61.4                                                              | 61.0 (57.1-64.8) | 46.0                                | 59.0 (54.1-63.7) | 38.7                                    | 66.5 (62.3-70.4) |
| ≥71                                    | 14.5                                                              | 14.4 (11.5-17.9) | 11.6                                | 14.8 (11.4-19.0) | 9.7                                     | 16.6 (13.2-20.6) |
| Race and ethnicity                     |                                                                   |                  |                                     |                  |                                         |                  |
| Asian                                  | 6.0                                                               | 5.9 (4.1-8.5)    | 4.5                                 | 5.8 (4.0-8.3)    | 4.4                                     | 7.5 (4.9-11.4)   |
| Black                                  | 12.1                                                              | 12.1 (9.0-16.0)  | 6.9                                 | 8.8 (6.3-12.2)   | 10.2                                    | 17.5 (12.9-23.4) |
| Hispanic                               | 15.1                                                              | 15.0 (11.9-18.6) | 12.5                                | 16.0 (12.4-20.4) | 9.0                                     | 15.4 (12.2-19.3) |
| White                                  | 63.0                                                              | 62.5 (58.3-66.6) | 50.2                                | 64.4 (60.0-68.7) | 32.7                                    | 56.2 (49.3-62.9) |
| Educational attainment <High School    | 12.2                                                              | 12.2 (10.6-14.1) | 9.7                                 | 12.5 (10.3-15.1) | 8.8                                     | 15.2 (13.6-16.9) |
| Income below the federal poverty level | 11.4                                                              | 12.7 (10.0-15.9) | 8.7                                 | 12.5 (9.7-15.9)  | 7.6                                     | 14.7 (10.3-20.7) |
| Uninsured                              | 13.1                                                              | 13.0 (9.9-16.8)  | 10.7                                | 13.7 (10.3-18.1) | 6.9                                     | 11.8 (9.4-14.8)  |

|                                    |       |                     |      |                     |      |                     |
|------------------------------------|-------|---------------------|------|---------------------|------|---------------------|
| Usual source of care               | 85.9  | 85.3 (81.9-88.1)    | 65.8 | 84.4 (80.9-87.4)    | 51.8 | 89.0 (85.0-92.1)    |
| Weight status <sup>f</sup>         |       |                     |      |                     |      |                     |
| Normal                             | 17.1  | 17.0 (14.1-20.3)    | 12.5 | 16.1 (12.9-19.8)    | 9.1  | 15.7 (12.1-20.1)    |
| Overweight                         | 34.8  | 34.5 (31.0-38.3)    | 26   | 33.4 (29.8-37.2)    | 19.2 | 32.9 (27.7-38.7)    |
| Obesity                            | 48.8  | 48.5 (45.2-51.8)    | 39.4 | 50.5 (45.7-55.4)    | 29.9 | 51.4 (47.1-55.6)    |
| Body mass index, kg/m <sup>2</sup> | 100.7 | 31.0 (30.6-31.5)    | 77.9 | 31.3 (30.8-31.9)    | 58.2 | 31.6 (30.7-32.4)    |
| Waist circumference, cm            | 98.6  | 104.2 (103.1-105.3) | 76.3 | 105.1 (103.7-106.5) | 57   | 105.3 (103.6-107.0) |
| Fasting plasma glucose, mg/dL      | 100.7 | 111.8 (110.7-113.0) | 77.9 | 116.0 (114.8-117.3) | 58.2 | 112.3 (110.3-114.3) |
| Hemoglobin A <sub>1c</sub> , %     | 100.7 | 5.73 (5.69-5.78)    | 77.9 | 5.70 (5.64-5.76)    | 58.2 | 6.02 (5.98-6.07)    |

- a Categorical variables are expressed as weighted column percentages (95% CI). Body mass index, waist circumference, and glycemic testing results are expressed as mean (95% CI).
- b Defined as fasting plasma glucose  $\geq 100$  mg/dL or hemoglobin A<sub>1c</sub>  $\geq 5.7\%$ .
- c Defined as fasting plasma glucose  $\geq 100$  mg/dL.
- d Defined as hemoglobin A<sub>1c</sub>  $\geq 5.7\%$ .
- e These numbers represent the population size in millions among all U.S. adults.
- f Overweight and obesity status were determined based on a measured BMI of  $\geq 25$ kg/m<sup>2</sup> and  $\geq 30$ kg/m<sup>2</sup>, respectively, for all racial and ethnic groups. Normal weight status was defined by a BMI  $< 25$ kg/m<sup>2</sup>.

**Appendix Table 2: Performance of Screening Criteria based on Fasting Plasma Glucose Alone by Self-Reported Race and Ethnicity<sup>a,b</sup>**

| Screening Criteria and Population group | Sensitivity, % (95% CI) | Specificity, % (95% CI) | Positive predictive value, % (95% CI) | Negative predictive value, % (95% CI) |
|-----------------------------------------|-------------------------|-------------------------|---------------------------------------|---------------------------------------|
| <b>2015 USPSTF Criteria<sup>c</sup></b> |                         |                         |                                       |                                       |
| Total population                        | 52.0 (48.1-55.9)        | 71.1 (67.8-74.3)        | 50.4 (46.1-54.8)                      | 72.4 (68.7-75.9)                      |
| Asian                                   | 37.5 (27.8-48.3)        | 81.3 (74.7-86.5)        | 53.4 (44.7-61.8)                      | 69.5 (63.0-75.2)                      |
| Black                                   | 61.4 (54.0-68.3)        | 66.2 (61.7-70.4)        | 42.1 (37.0-47.4)                      | 81.1 (76.3-85.0)                      |
| Hispanic                                | 54.0 (48.0-59.9)        | 73.9 (69.3-78.1)        | 54.1 (47.6-60.4)                      | 73.9 (69.1-78.1)                      |
| White                                   | 53.0 (47.9-58.0)        | 70.1 (64.7-75.0)        | 50.9 (44.9-56.9)                      | 71.9 (66.5-76.7)                      |
| <i>P</i> -value <sup>d</sup>            | <b>0.02</b>             | <b>&lt;0.01</b>         | <b>&lt;0.01</b>                       | <b>0.01</b>                           |
| <b>2021 USPSTF Criteria<sup>e</sup></b> |                         |                         |                                       |                                       |
| Total population                        | 58.3 (54.2-62.3)        | 64.6 (61.0-68.1)        | 48.2 (44.3-52.1)                      | 73.3 (69.2-77.1)                      |
| Asian                                   | 43.7 (32.7-55.4)        | 77.7 (72.0-82.5)        | 52.8 (45.7-59.8)                      | 70.7 (63.1-77.4)                      |
| Black                                   | 68.7 (62.0-74.6)        | 60.9 (55.8-65.8)        | 41.3 (36.3-46.6)                      | 82.9 (78.3-86.7)                      |
| Hispanic                                | 65.0 (57.6-71.8)        | 62.8 (58.4-67.1)        | 49.9 (43.3-56.4)                      | 76.0 (70.3-80.8)                      |
| White                                   | 57.6 (52.8-62.3)        | 64.3 (58.7-69.5)        | 48.6 (43.2-53.9)                      | 72.2 (66.6-77.2)                      |
| <i>P</i> -value <sup>e</sup>            | <b>&lt;0.01</b>         | <b>&lt;0.01</b>         | <b>0.03</b>                           | <b>0.02</b>                           |

USPSTF = United States Preventive Services Task Force

- a The eligible population for this analysis comprises U.S. adults without diagnosed diabetes.
- b Prediabetes and undiagnosed diabetes are collectively defined by fasting plasma glucose  $\geq$  100 mg/dL.
- c The 2015 USPSTF screening criteria were age 40-70 years and BMI  $\geq$ 25kg/m<sup>2</sup>.
- d *P*-values for racial and ethnic differences in performance characteristics of the USPSTF screening criteria were determined using Chi-square tests. Boldface indicates statistical significance.
- e The 2021 USPSTF screening criteria are age 35-70 years and BMI  $\geq$ 25kg/m<sup>2</sup>.

**Appendix Table 3: Performance of Screening Criteria based on Hemoglobin A<sub>1c</sub> Alone by Self-Reported Race and Ethnicity<sup>a,b</sup>**

| Screening Criteria and Population group | Sensitivity, % (95% CI) | Specificity, % (95% CI) | Positive predictive value, % (95% CI) | Negative predictive value, % (95% CI) |
|-----------------------------------------|-------------------------|-------------------------|---------------------------------------|---------------------------------------|
| <b>2015 USPSTF Criteria<sup>c</sup></b> |                         |                         |                                       |                                       |
| Total population                        | 57.3 (53.1-61.4)        | 70.1 (67.0-73.1)        | 41.5 (36.9-46.3)                      | 81.6 (78.9-84.0)                      |
| Asian                                   | 42.7 (29.7-56.9)        | 83.8 (79.0-87.7)        | 58.8 (48.8-68.1)                      | 73.0 (65.7-79.2)                      |
| Black                                   | 59.2 (53.2-64.9)        | 70.9 (65.8-75.6)        | 60.3 (53.9-66.3)                      | 70.0 (65.0-74.6)                      |
| Hispanic                                | 55.6 (47.7-63.3)        | 70.7 (66.0-75.0)        | 40.1 (33.9-46.7)                      | 81.8 (77.9-85.2)                      |
| White                                   | 59.7 (53.2-66.0)        | 68.2 (63.5-72.6)        | 37.4 (30.4-45.0)                      | 84.2 (79.7-87.8)                      |
| <i>P</i> -value <sup>d</sup>            | 0.06                    | <b>&lt;0.01</b>         | <b>&lt;0.01</b>                       | <b>0.01</b>                           |
| <b>2021 USPSTF Criteria<sup>e</sup></b> |                         |                         |                                       |                                       |
| Total population                        | 63.1 (59.2-66.8)        | 63.4 (60.1-66.6)        | 39.0 (34.7-43.4)                      | 82.3 (79.7-84.6)                      |
| Asian                                   | 47.9 (35.9-60.1)        | 79.5 (73.8-84.3)        | 55.9 (46.8-64.6)                      | 73.8 (66.4-80.1)                      |
| Black                                   | 65.5 (59.5-71.1)        | 65.5 (59.8-70.8)        | 58.6 (52.3-64.6)                      | 71.8 (66.7-76.4)                      |
| Hispanic                                | 67.3 (59.1-74.7)        | 59.8 (54.9-64.5)        | 37.2 (31.6-43.2)                      | 83.8 (78.9-87.8)                      |
| White                                   | 63.4 (57.8-68.7)        | 62.3 (57.3-66.9)        | 34.8 (28.1-42.2)                      | 84.3 (80.3-87.5)                      |
| <i>P</i> -value <sup>e</sup>            | 0.10                    | <b>&lt;0.01</b>         | <b>&lt;0.01</b>                       | <b>0.01</b>                           |

USPSTF = United States Preventive Services Task Force

- a The eligible population for this analysis comprises U.S. adults without diagnosed diabetes.
- b Prediabetes and undiagnosed diabetes are collectively defined by hemoglobin A<sub>1c</sub> ≥ 5.7%.
- c The 2015 USPSTF screening criteria were age 40-70 years and BMI ≥25kg/m<sup>2</sup>.
- d *P*-values for racial and ethnic differences in performance characteristics of the USPSTF screening criteria were determined using Chi-square tests. Boldface indicates statistical significance.
- e The 2021 USPSTF screening criteria are age 35-70 years and BMI ≥25kg/m<sup>2</sup>.

**Appendix Table 4: Characteristics of U.S. Adults Aged 35-70 Years without Diagnosed Diabetes**

| Characteristic <sup>a</sup>                  | % (95% CI)          |
|----------------------------------------------|---------------------|
| Unweighted n                                 | 1922                |
| Weighted n <sup>b</sup>                      | 124.1               |
| Female sex                                   | 53.1 (50.5-55.7)    |
| Mean age, years                              | 51.9 (51.0-52.9)    |
| Age categories, years                        |                     |
| 18-34                                        | 0.0 (. -. )         |
| 35-39                                        | 14.4 (12.5-16.6)    |
| 40-70                                        | 85.6 (83.4-87.5)    |
| ≥71                                          | 0.0 (. -. )         |
| Race and ethnicity                           |                     |
| Asian                                        | 5.8 (4.1-8.1)       |
| Black                                        | 10.8 (8.4-13.9)     |
| Hispanic                                     | 15.5 (12.5-19.0)    |
| White                                        | 64.3 (59.7-68.7)    |
| Educational attainment <High School          | 11.6 (10.2-13.1)    |
| Income below the federal poverty level       | 12.5 (10.1-15.5)    |
| Uninsured                                    | 13.3 (10.5-16.8)    |
| Usual source of care                         | 85.1 (81.0-88.5)    |
| Weight status <sup>c</sup>                   |                     |
| Normal                                       | 23.6 (20.7-26.7)    |
| Overweight                                   | 37.8 (34.5-41.3)    |
| Obesity                                      | 38.6 (35.3-42.1)    |
| Body mass index, kg/m <sup>2</sup>           | 29.7 (29.2-30.2)    |
| Waist circumference, cm                      | 100.8 (99.5-102.2)  |
| Fasting plasma glucose, mg/dL <sup>d,e</sup> |                     |
| 100-109                                      | 35.7 (32.9-38.6)    |
| 110-125                                      | 13.8 (11.1-17.1)    |
| ≥126                                         | 4.5 (3.5-5.7)       |
| Mean                                         | 105.1 (104.4-105.9) |
| Hemoglobin A1c, % <sup>d,e</sup>             |                     |
| 5.7-5.9                                      | 21.0 (18.5-23.9)    |

|         |                  |
|---------|------------------|
| 6.0-6.4 | 9.9 (8.3-11.8)   |
| ≥6.5    | 3.5 (2.8-4.4)    |
| Mean    | 5.56 (5.53-5.59) |

- a Categorical variables are expressed as weighted column percentages (95% CI). Body mass index and waist circumference are expressed as mean (95% CI).
- b This number represents the population size in millions among all U.S. adults.
- c Overweight and obesity status were determined based on a measured BMI of  $\geq 25\text{kg/m}^2$  and  $\geq 30\text{kg/m}^2$ , respectively, for all racial and ethnic groups. Normal weight status was defined by a BMI  $< 25\text{kg/m}^2$ .
- d Glycemic measures are expressed as weighted column percentages (95% CI) within each specified range of test values, followed by the mean value for each glycemic test.
- e Some estimates within strata of glycemic values may not be statistically reliable due to small sample sizes.
